# Supplementary material
Source: MDPI journal article supplement (https://www.mdpi.com/1424-2818/11/2/25)

**Supplemental material Table S1.** Sampling specimens for stomach content analysis form previous study and additional sampling in this study

| Species                     | Lee et al. 2014<br>(April & July, 2011) |               | Additional sampling<br>(July & October, 2011) |          |
|-----------------------------|-----------------------------------------|---------------|-----------------------------------------------|----------|
|                             | n                                       | TL range (cm) | n                                             | TL range |
| <i>Lethrinus atkinsoni</i>  |                                         |               |                                               |          |
| Small                       | 13                                      | 2-5           | 13                                            | 2-6      |
| Medium                      | 5                                       | 8-14          | 6                                             | 6-15     |
| Large                       | 6                                       | 15-19         | 16                                            | 18-30    |
| <i>Lethrinus obsoletus</i>  |                                         |               |                                               |          |
| Small                       | 18                                      | 2-6           | 10                                            | 2-6      |
| Medium                      | 8                                       | 6-13          | 22                                            | 6-15     |
| Large                       | 4                                       | 15-25         | 15                                            | 15-30    |
| <i>Lethrinus harak</i>      |                                         |               |                                               |          |
| Small                       | 13                                      | 3-6           | 19                                            | 2-6      |
| Medium                      | 20                                      | 6-13          | 13                                            | 6-15     |
| Large                       | 12                                      | 15-20         | 10                                            | 17-36    |
| <i>Lutjanus fulviflamma</i> |                                         |               |                                               |          |
| Small                       | 0                                       |               | 24                                            | 2-7      |
| Medium                      | 6                                       | 6-13          | 4                                             | 6-11     |
| Large                       | 2                                       | 20-21         | 21                                            | 15-24    |

**Supplemental material Figure S1.** MDS results of stomach content analysis form previous study and additional sampling of (a) *Lethrinus atkinsoni*; (b) *Lethrinus obsoletus*; (c) *Lethrinus harak* and (d) *Lutjanus fulviflamma*. All data show significant different between body size, but was not significant different between two sampling. The abbreviations of body length size categories are S: small, M: medium and L: large.

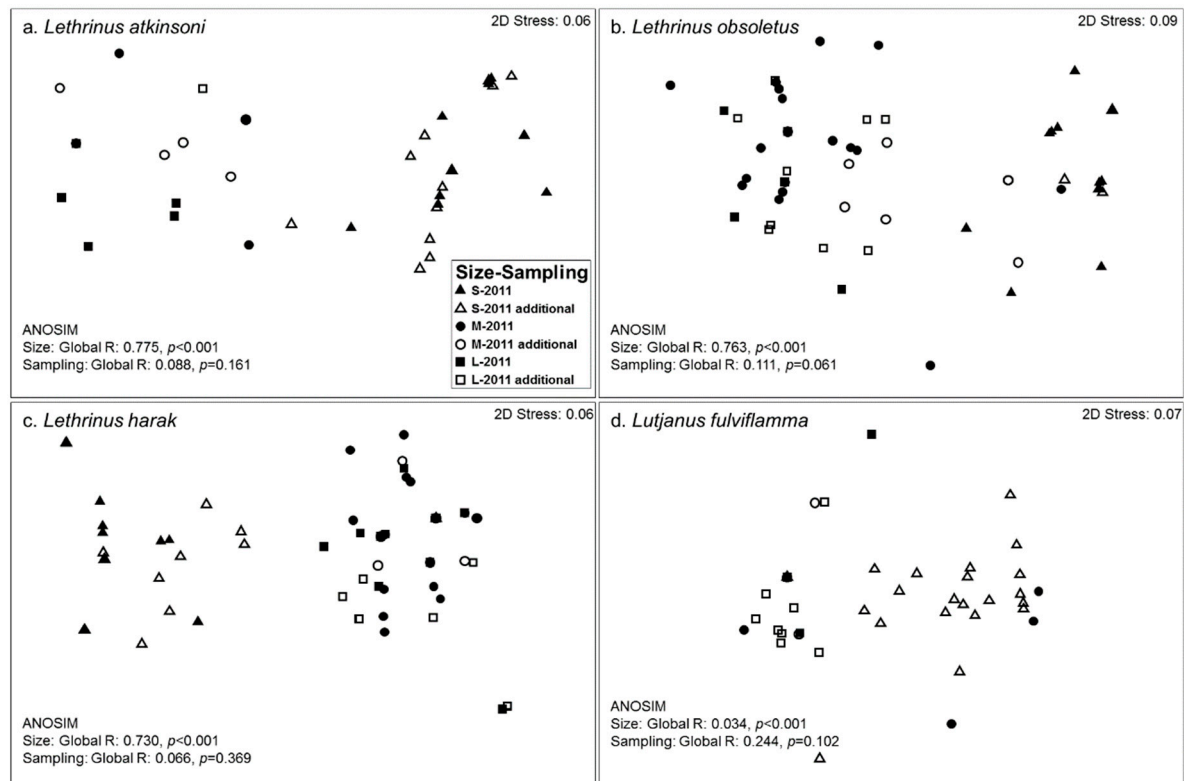

Supplement: s1 [file s1]
